# Supplementary material for: Structures and chemical bonding of boron-based B12O and B11Au clusters. A counterexample in boronyl chemistry
Source: Royal Society of Chemistry journal article supplement (doi:10.1039/d2cp01277d), 2022-01-01

## SUPPLEMENTARY INFORMATION

### Structures and Chemical Bonding of Boron-Based B<sub>12</sub>O and B<sub>11</sub>Au Clusters. A Counterexample in Boronyl Chemistry

Peng-Fei Li and Hua-Jin Zhai\*

*Nanocluster Laboratory, Institute of Molecular Science, Shanxi University, Taiyuan 030006, China*

\*E-mail: [hj.zhai@sxu.edu.cn](mailto:hj.zhai@sxu.edu.cn)

- Table S1.** Cartesian coordinates for the global-minimum (GM) structures of B<sub>12</sub>O (**1**, C<sub>1</sub>, <sup>1</sup>A) and B<sub>11</sub>Au (**5**, C<sub>s</sub>, <sup>1</sup>A') clusters at the B3LYP/B/O/6-311+G(d)/Au/Stuttgart\_rsc\_1997\_ecp+2f1g level.
- Table S2.** Calculated nucleus-independent chemical shifts (NICSSs) of B<sub>12</sub>O (**1**), B<sub>11</sub>Au (**5**), and B<sub>12</sub> clusters, as well as those of benzene molecule, at the B3LYP/6-311+G(d) (with the Stuttgart\_rsc\_1997\_ecp+2f1g basis set for Au) level.
- Figure S1.** Alternative optimized low-lying structures of B<sub>12</sub>O cluster. Relative energies are shown in kcal mol<sup>-1</sup> at the B3LYP/6-311+G(d) level (without parenthesis). Also shown are energetics data for top 5 lowest-energy isomers at the PBE0/6-311+G(d) level (in parentheses), at the B3LYP/cc-pvtz and B3LYP/aug-cc-pvtz levels (in curly brackets), and at the single-point CCSD(T)/cc-pvtz//B3LYP/cc-pvtz level (in square brackets). All energies at the density-functional theory (DFT) levels have been corrected for zero-point energies (ZPEs).

**Figure S2.** Alternative optimized low-lying structures of  $B_{12}O^-$  cluster. Relative energies are shown in kcal mol<sup>-1</sup> at the B3LYP/6-311+G(d) level (without parenthesis). Also shown are energetics data for top 5 lowest-energy isomers at the PBE0/6-311+G(d) level (in parentheses), at the B3LYP/cc-pvtz and B3LYP/aug-cc-pvtz levels (in curly brackets), and at the single-point CCSD(T)/cc-pvtz//B3LYP/cc-pvtz level (in square brackets). All energies at the DFT levels have been corrected for ZPEs.

**Figure S3.** Alternative optimized low-lying structures of  $B_{11}Au$  cluster. Relative energies are shown in kcal mol<sup>-1</sup> at the B3LYP/B/6-311+G(d)/Au/Stuttgart level (without parentheses). Also shown are energetics data for top 4 lowest-energy isomers at the PBE0/B/6-311+G(d)/Au/Stuttgart level (in parentheses), at the B3LYP/B/cc-pvtz/Au/cc-pvtz-pp and B3LYP/B/aug-cc-pvtz/Au/Stuttgart levels (in curly brackets), and at the single-point CCSD(T)/cc-pvtz//B3LYP/cc-pvtz (cc-pvtz-pp for Au) level (in square brackets). Here the term “Stuttgart” stands for Stuttgart\_rsc\_1997\_ecp+2f1g. All energies at the DFT levels have been corrected for ZPEs.

**Figure S4.** Alternative optimized low-lying structures of  $B_{11}Au^-$  cluster. Relative energies are shown in kcal mol<sup>-1</sup> at the B3LYP/B/6-311+G(d)/Au/Stuttgart level (without parentheses). Also shown are energetics data for top 4 lowest-energy isomers at the PBE0/B/6-311+G(d)/Au/Stuttgart level (in parentheses), at the B3LYP/B/cc-pvtz/Au/cc-pvtz-pp and B3LYP/B/aug-cc-pvtz/Au/Stuttgart levels (in curly brackets), and at the single-point CCSD(T)/cc-pvtz//B3LYP/cc-pvtz (cc-pvtz-pp for Au) level (in square brackets). Here the term “Stuttgart” stands for Stuttgart\_rsc\_1997\_ecp+2f1g. All energies at the DFT levels have been corrected for ZPEs.

**Figure S5.** A primitive bonding scheme for delocalized  $\sigma$  framework in  $B_{11}Au$  (**5**) cluster from the adaptive natural density partitioning (AdNDP) analysis. Occupation numbers (ONs) are shown. In this scheme, the  $\sigma$  framework is islanded as three-center

two-electron (3c-2e) bonds. Its refined version is presented in Figure 8(d), in which the islands are expanded to 4c-2e  $\sigma$  bonds with moderately improved ON values.

**Figure S6.** Simulated photoelectron spectra of (a)  $B_{12}O^-$  (**3**) and (b)  $B_{11}Au^-$  (**7**) clusters at the time-dependent PBE0/6-311+G(d) (Stuttgart\_rsc\_1997\_ecp+2f1g for Au) level, in comparison with that of (c)  $B_{12}^-$  cluster. The simulations were done by fitting the calculated vertical detachment energies (VDEs) with unit-area Gaussian functions of 0.04 eV half-width.

**Table S1.** Cartesian coordinates for the global-minimum (GM) structures of B<sub>12</sub>O (**1**, C<sub>1</sub>, <sup>1</sup>A) and B<sub>11</sub>Au (**5**, C<sub>s</sub>, <sup>1</sup>A') clusters at the B3LYP/B/O/6-311+G(d)/Au/Stuttgart\_rsc\_1997\_ecp+2f1g level.

B<sub>12</sub>O (**1**, C<sub>1</sub>, <sup>1</sup>A)

|   |             |             |             |
|---|-------------|-------------|-------------|
| B | -1.29648500 | -0.23696500 | 0.26746900  |
| B | 0.28036100  | -0.73495400 | 0.38481100  |
| B | -2.39523100 | -1.36974800 | -0.18444300 |
| B | 0.71715200  | -2.23506300 | -0.07567600 |
| B | 1.85392500  | -1.20479700 | -0.06917200 |
| B | 0.01848700  | 0.89031300  | 0.33710000  |
| B | -1.90068800 | 1.40531500  | -0.06321800 |
| B | -0.61076600 | 2.37606600  | -0.10925200 |
| B | -2.82184500 | 0.11409700  | -0.14768400 |
| B | 1.78334400  | 0.90291800  | -0.01293000 |
| B | -0.86819500 | -1.95177000 | -0.03735500 |
| B | 0.91923700  | 2.21410600  | -0.08003400 |
| O | 2.70044100  | -0.10594900 | -0.13100900 |

B<sub>11</sub>Au (**5**, C<sub>s</sub>, <sup>1</sup>A')

|   |            |             |            |
|---|------------|-------------|------------|
| B | 1.31560600 | -0.44088600 | 0.00000000 |
| B | 3.95134700 | -1.29708500 | 0.00000000 |
| B | 4.74996500 | 0.03270300  | 0.00000000 |
| B | 4.31438100 | 1.49250800  | 0.00000000 |
| B | 3.15399200 | 2.51663900  | 0.00000000 |
| B | 1.65514900 | 2.91933200  | 0.00000000 |
| B | 0.30479400 | 2.21027300  | 0.00000000 |
| B | 1.60693900 | 1.19931200  | 0.00000000 |

|    |             |             |            |
|----|-------------|-------------|------------|
| B  | 3.01417100  | 0.15840200  | 0.00000000 |
| B  | 0.00000000  | 0.62816800  | 0.00000000 |
| B  | 2.42916000  | -1.50673400 | 0.00000000 |
| Au | -1.67693100 | -0.50079900 | 0.00000000 |

**Table S2.** Calculated nucleus-independent chemical shifts (NICSs) of B<sub>12</sub>O (**1**), B<sub>11</sub>Au (**5**), and B<sub>12</sub> clusters, as well as those of benzene molecule, at the B3LYP/6-311+G(d) (with the Stuttgart\_rsc\_1997\_ecp+2f1g basis set for Au) level.

| Species                                      | NICS (ppm) | NICS <sub>zz</sub> (ppm) |
|----------------------------------------------|------------|--------------------------|
| B <sub>12</sub> O ( <b>1</b> ) <sup>a</sup>  | -10.09     | -29.10                   |
| B <sub>11</sub> Au ( <b>5</b> ) <sup>b</sup> | -18.80     | -50.46                   |
| B <sub>12</sub> <sup>c</sup>                 | -12.77     | -43.19                   |
| C <sub>6</sub> H <sub>6</sub> <sup>d</sup>   | -10.14     | -28.99                   |

<sup>a</sup> Calculated at 1 Å above the center of inner B<sub>3</sub> triangular ring.

<sup>b</sup> Calculated at 1 Å above the center of 11 boron atoms.

<sup>c</sup> Calculated at 1 Å above the center of inner B<sub>3</sub> triangular ring.

<sup>d</sup> Calculated at 1 Å above the ring center.

**Figure S1.** Alternative optimized low-lying structures of B<sub>12</sub>O cluster. Relative energies are shown in kcal mol<sup>-1</sup> at the B3LYP/6-311+G(d) level (without parenthesis). Also shown are energetics data for top 5 lowest-energy isomers at the PBE0/6-311+G(d) level (in parentheses), at the B3LYP/cc-pvtz and B3LYP/aug-cc-pvtz levels (in curly brackets), and at the single-point CCSD(T)/cc-pvtz//B3LYP/cc-pvtz level (in square brackets). All energies at the density-functional theory (DFT) levels have been corrected for zero-point energies (ZPEs).

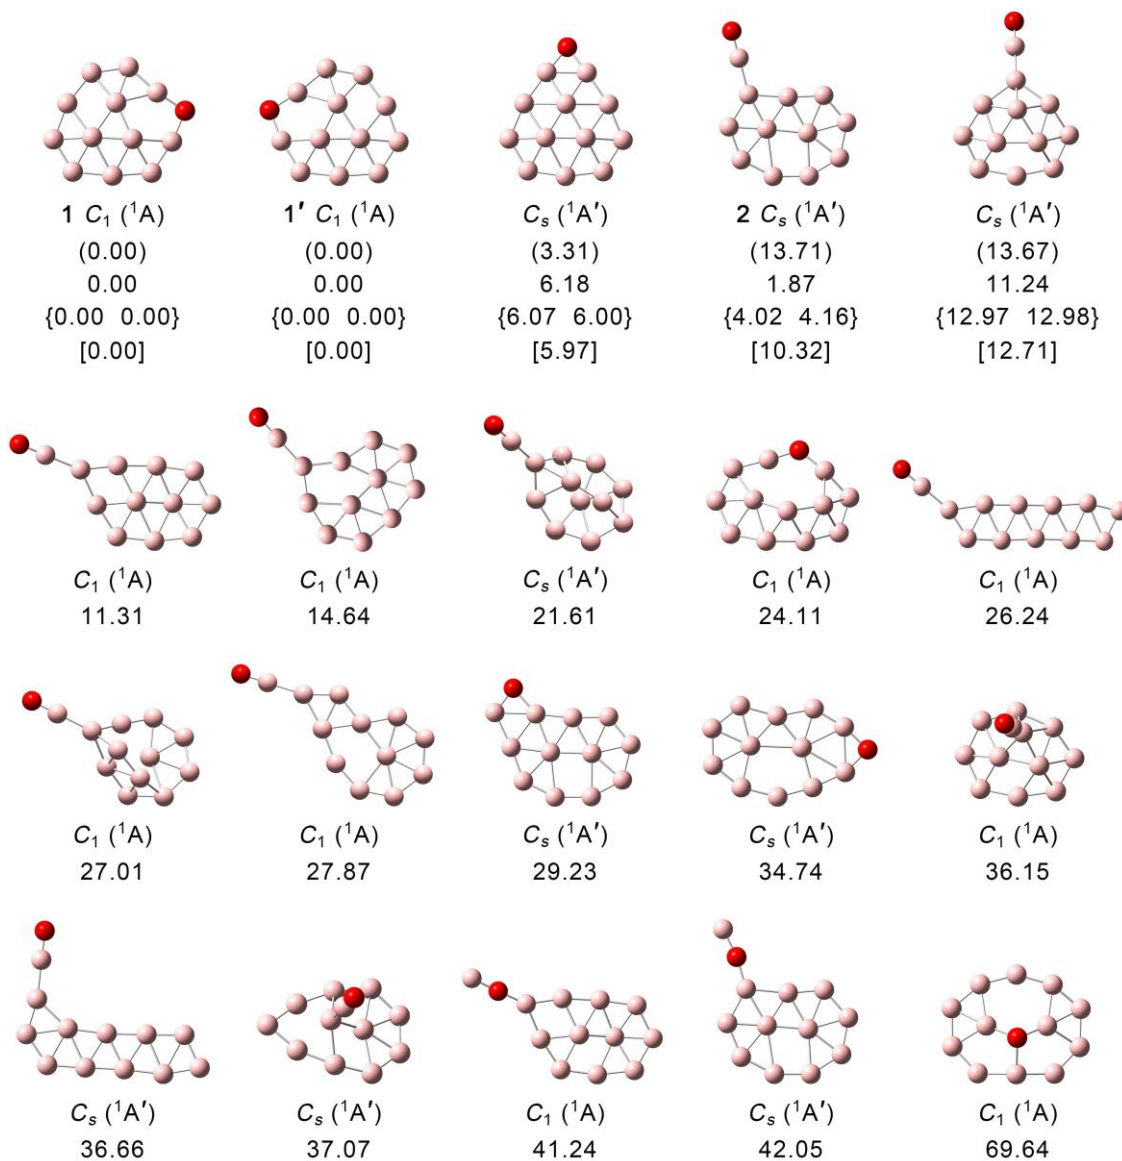

**Figure S2.** Alternative optimized low-lying structures of  $B_{12}O^-$  cluster. Relative energies are shown in kcal mol<sup>-1</sup> at the B3LYP/6-311+G(d) level (without parenthesis). Also shown are energetics data for top 5 lowest-energy isomers at the PBE0/6-311+G(d) level (in parentheses), at the B3LYP/cc-pvtz and B3LYP/aug-cc-pvtz levels (in curly brackets), and at the single-point CCSD(T)/cc-pvtz//B3LYP/cc-pvtz level (in square brackets). All energies at the DFT levels have been corrected for ZPEs.

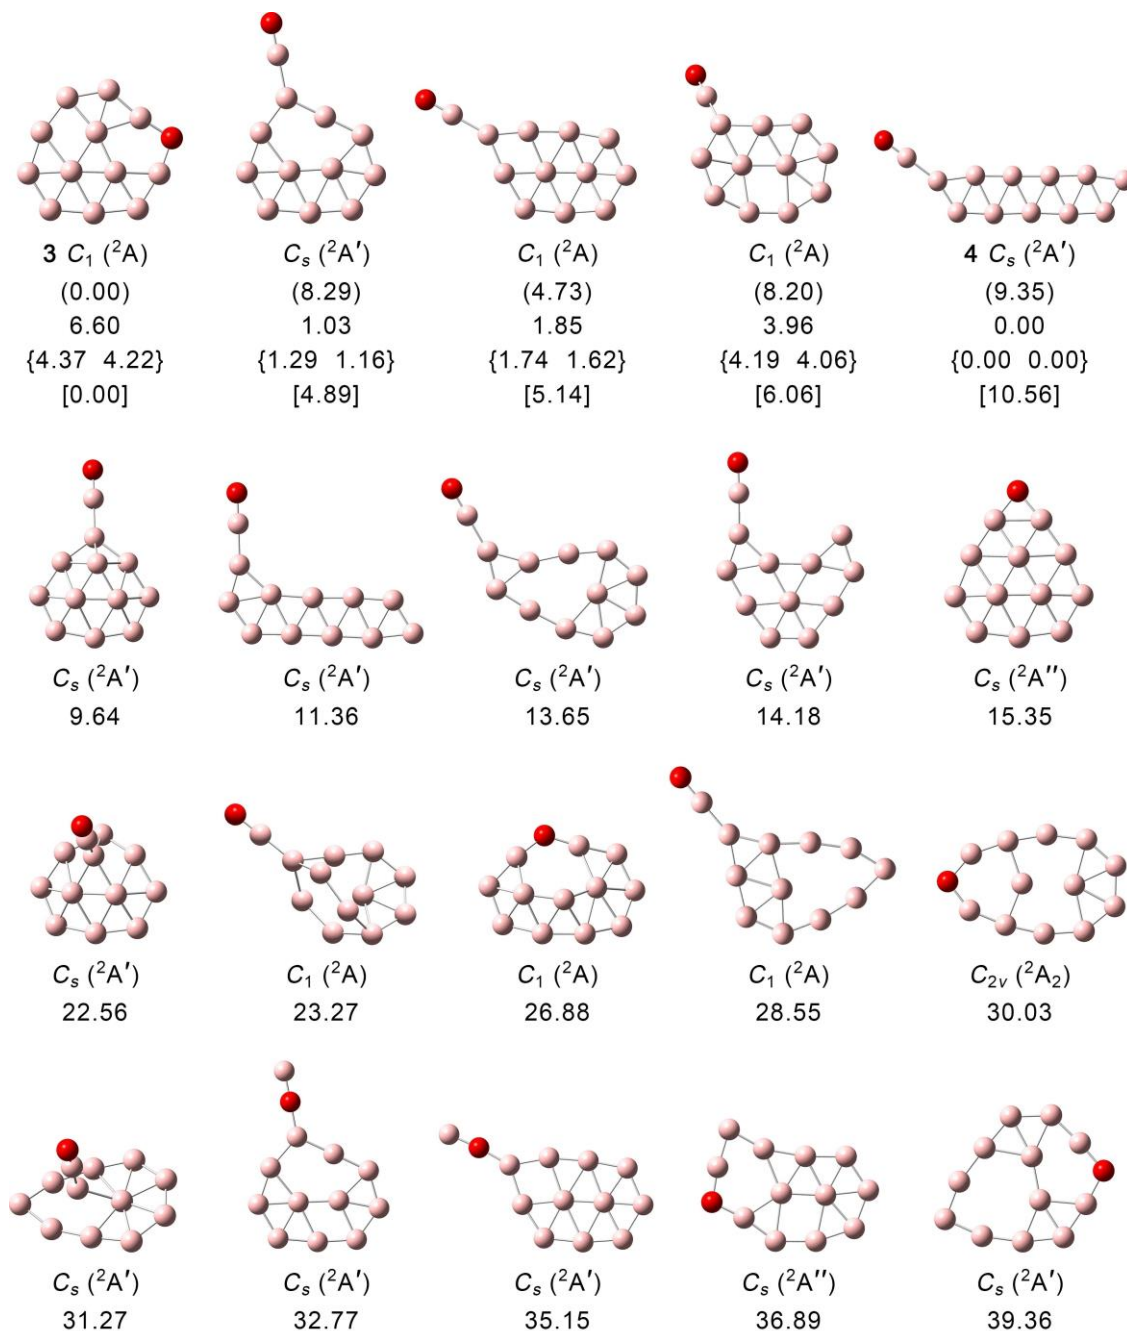



**Figure S3.** Alternative optimized low-lying structures of  $B_{11}Au$  cluster. Relative energies are shown in kcal mol<sup>-1</sup> at the B3LYP/B/6-311+G(d)/Au/Stuttgart level (without parentheses). Also shown are energetics data for top 4 lowest-energy isomers at the PBE0/B/6-311+G(d)/Au/Stuttgart level (in parentheses), at the B3LYP/B/cc-pvtz/Au/cc-pvtz-pp and B3LYP/B/aug-cc-pvtz/Au/Stuttgart levels (in curly brackets), and at the single-point CCSD(T)/cc-pvtz//B3LYP/cc-pvtz (cc-pvtz-pp for Au) level (in square brackets). Here the term “Stuttgart” stands for Stuttgart\_rsc\_1997\_ecp+2f1g. All energies at the DFT levels have been corrected for ZPEs.

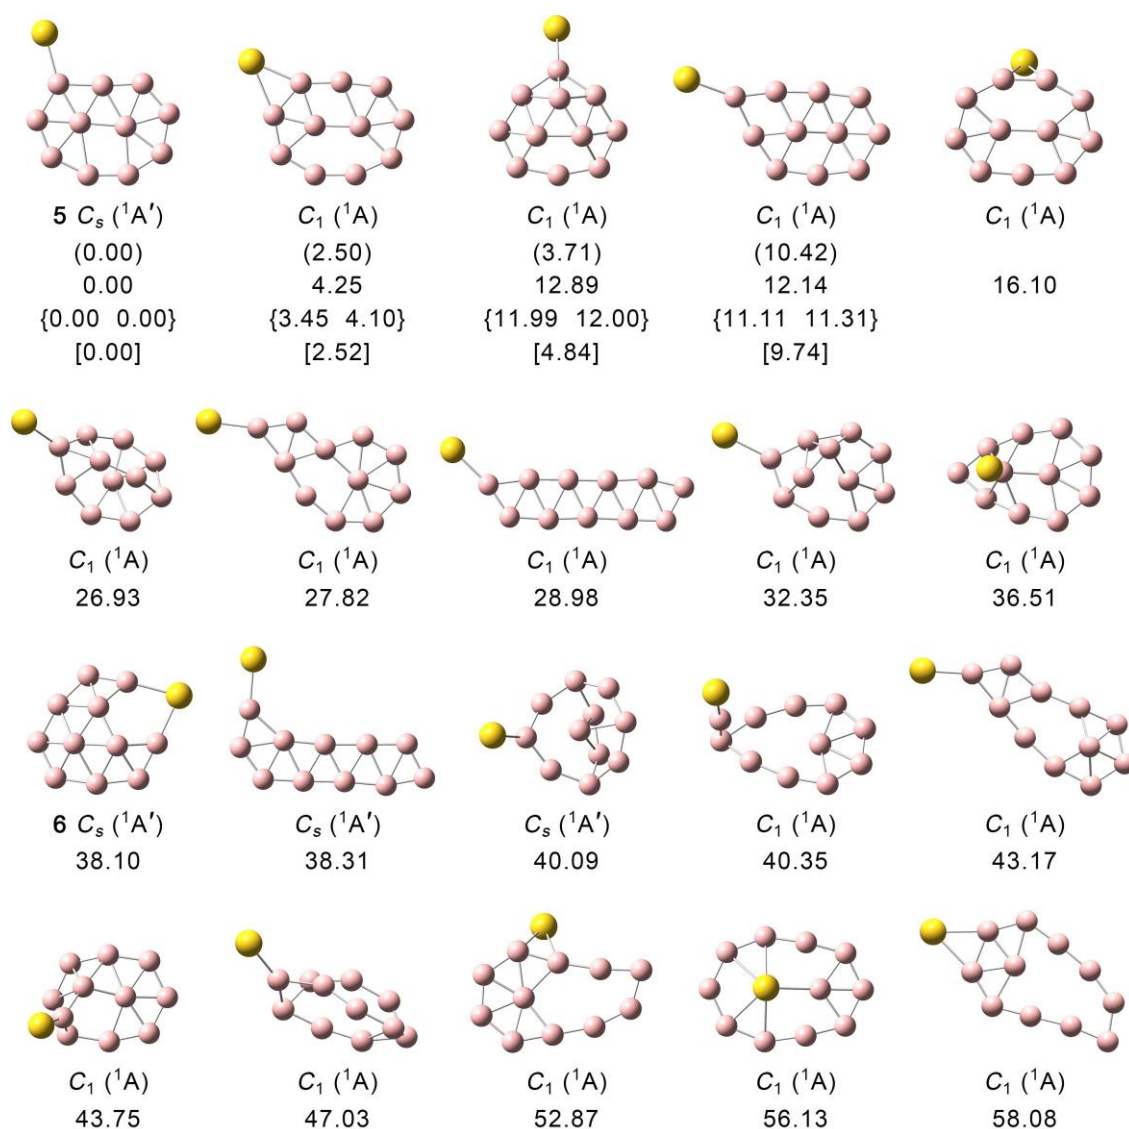

**Figure S4.** Alternative optimized low-lying structures of  $B_{11}Au^-$  cluster. Relative energies are shown in kcal mol<sup>-1</sup> at the B3LYP/B/6-311+G(d)/Au/Stuttgart level (without parentheses). Also shown are energetics data for top 4 lowest-energy isomers at the PBE0/B/6-311+G(d)/Au/Stuttgart level (in parentheses), at the B3LYP/B/cc-pvtz/Au/cc-pvtz-pp and B3LYP/B/aug-cc-pvtz/Au/Stuttgart levels (in curly brackets), and at the single-point CCSD(T)/cc-pvtz//B3LYP/cc-pvtz (cc-pvtz-pp for Au) level (in square brackets). Here the term “Stuttgart” stands for Stuttgart\_rsc\_1997\_ecp+2f1g. All energies at the DFT levels have been corrected for ZPEs.

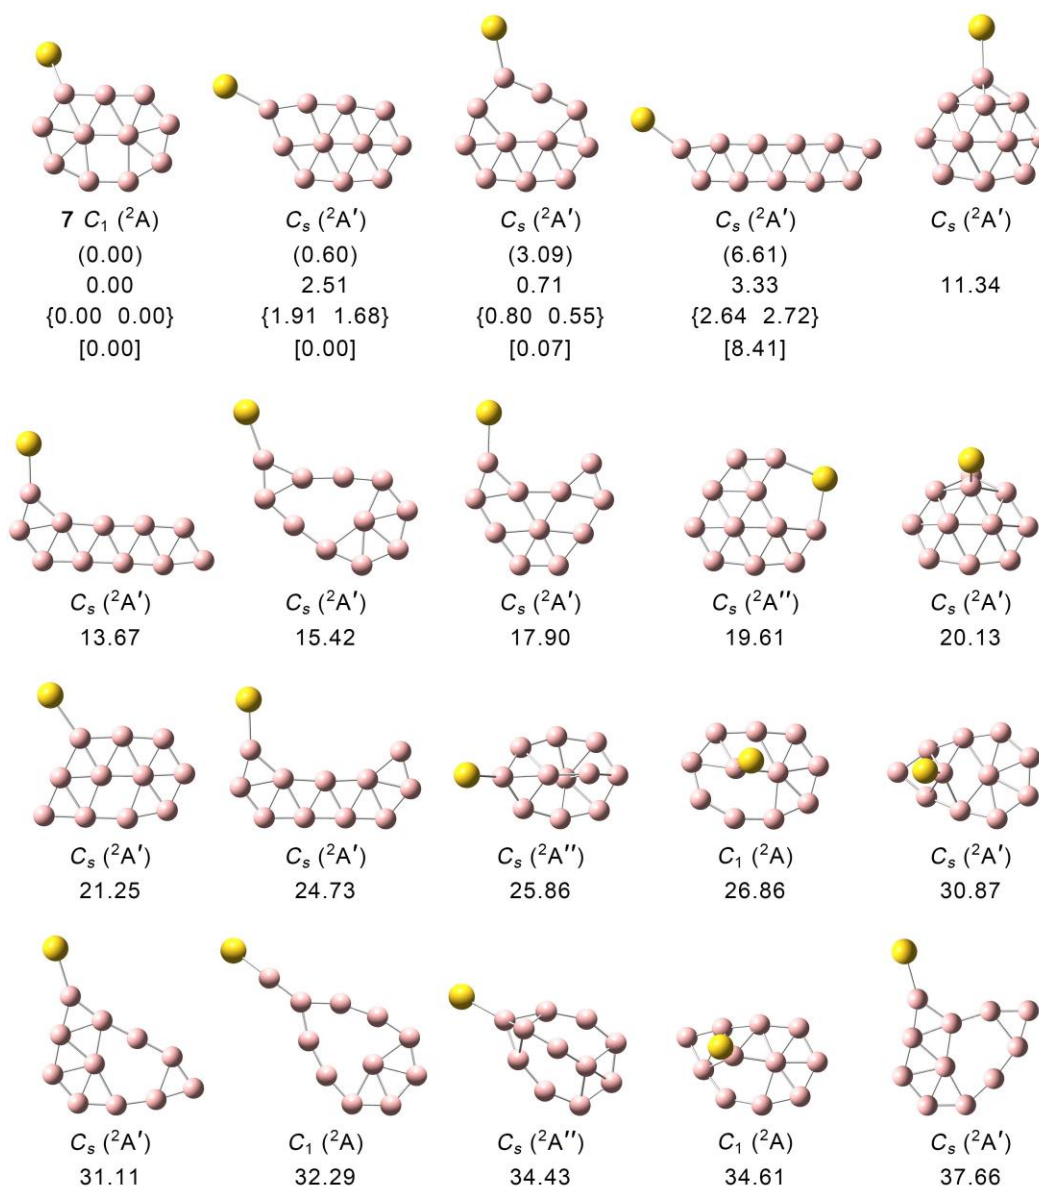

**Figure S5.** A primitive bonding scheme for delocalized  $\sigma$  framework in  $B_{11}Au$  (**5**) cluster from the adaptive natural density partitioning (AdNDP) analysis. Occupation numbers (ONs) are shown. In this scheme, the  $\sigma$  framework is islanded as three-center two-electron (3c-2e) bonds. Its refined version is presented in Figure 8(d), in which the islands are expanded to 4c-2e  $\sigma$  bonds with moderately improved ON values.

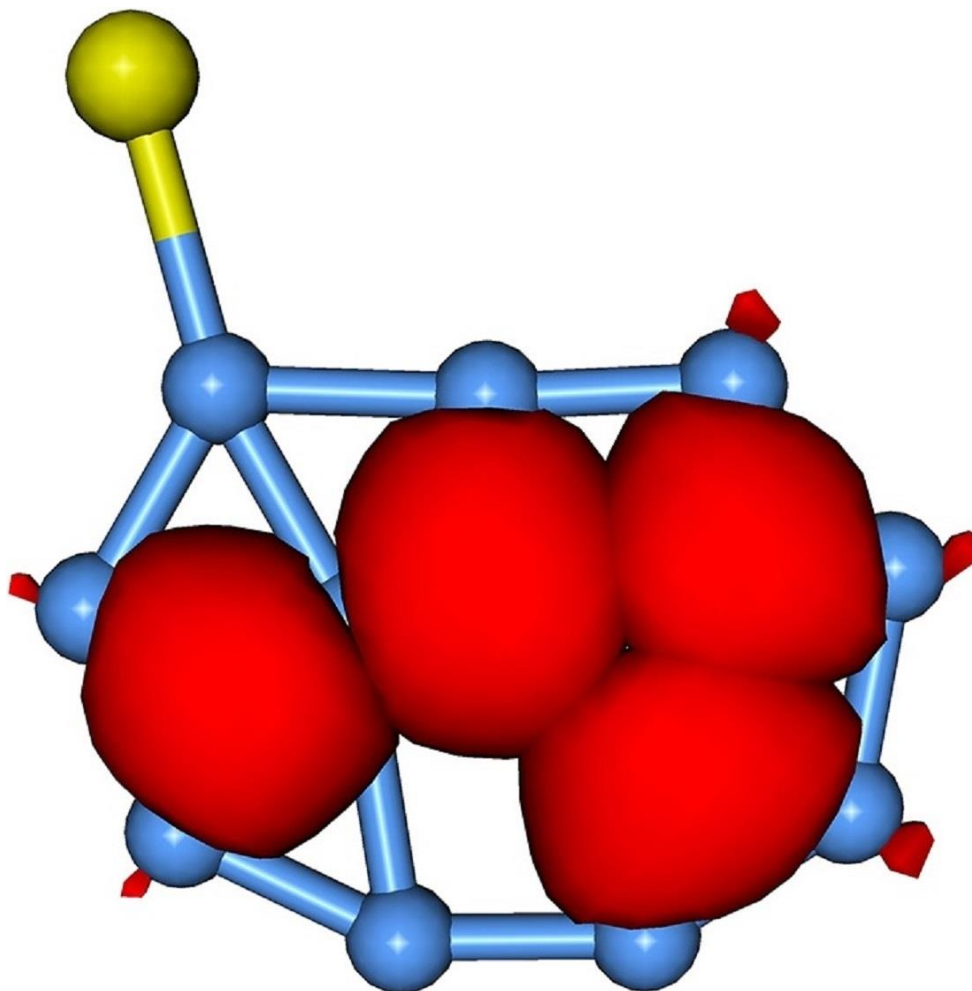

$4 \times 3c-2e$   $\sigma$  bonds  
ON=1.71–1.88 |e|

**Figure S6.** Simulated photoelectron spectra of (a)  $B_{12}O^-$  (**3**) and (b)  $B_{11}Au^-$  (**7**) clusters at the time-dependent PBE0/6-311+G(d) (Stuttgart\_rsc\_1997\_eCP+2f1g for Au) level, in comparison with that of (c)  $B_{12}^-$  cluster. The simulations were done by fitting the calculated vertical detachment energies (VDEs) with unit-area Gaussian functions of 0.04 eV half-width.

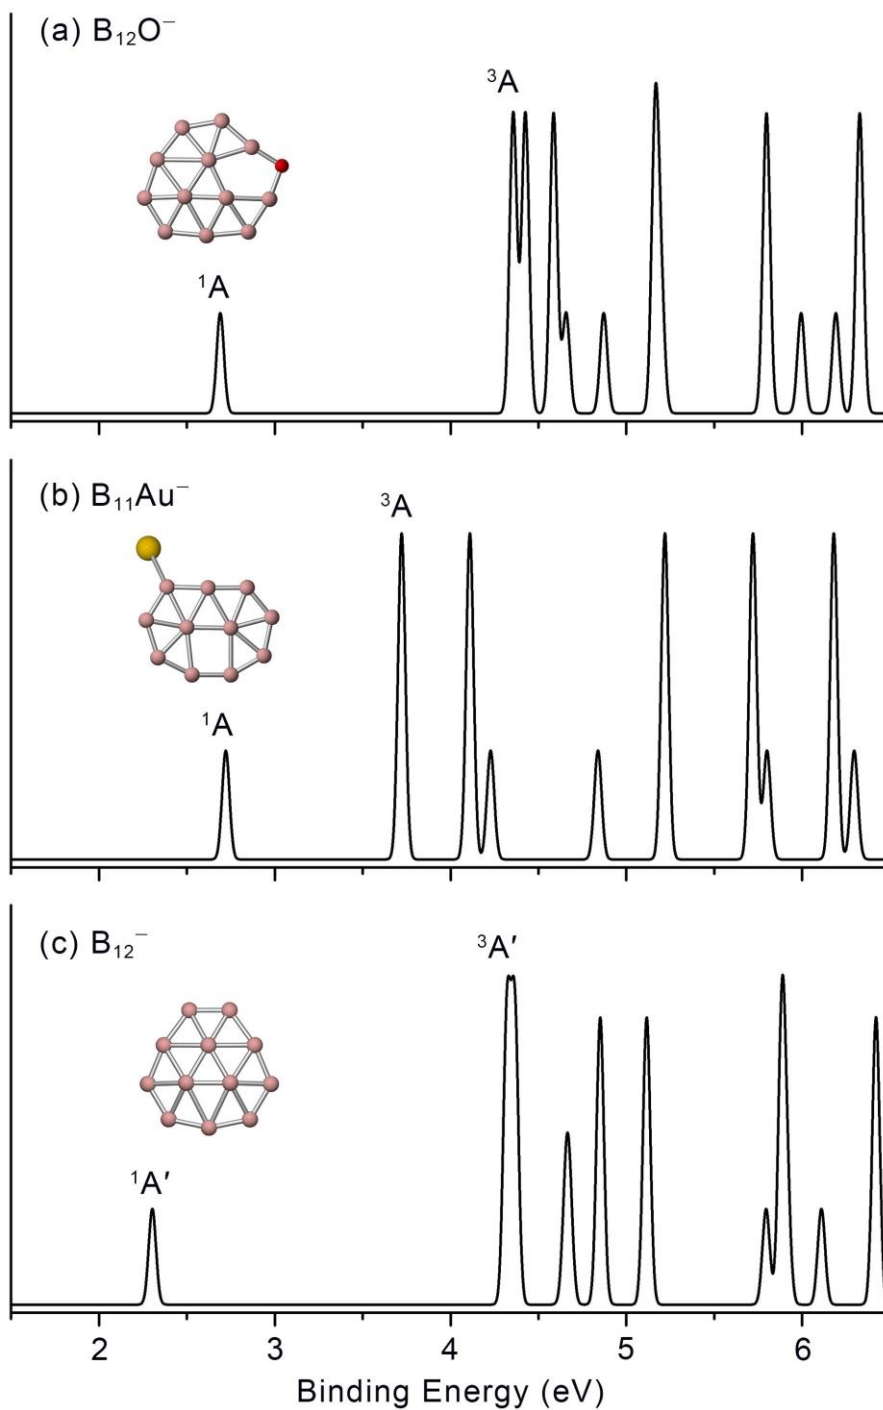

Supplement: d2cp01277d1.pdf [file d2cp01277d1.pdf]
